# Supplementary material
Source: PubMed Central journal article supplement (PMC5214430)

1 **Supplementary Figure Legend**

2

3 **Supporting Figure 1. Gene expression by differentially polarized RAW and MSRC2 cells.**

4 (A) qPCR analysis of polarization-related genes *arg1* (arginase) and *nos2* (iNOS) in RAW 264.7  
5 cells cultured for 2h in either plain media (M0), LPS (M1), or IL-4 and IL-13 (M2). Expression  
6 levels were calculated via the ddCT method and normalized to HPRT expression, then  
7 normalized to expression of M0 stimulated RAW cells. Data are mean±SEM for n=3. (B) qPCR  
8 analysis of *msr1* (SR-AI) gene expression by RAW cells cultured for 2h in either plain media  
9 (M0), LPS (M1), or IL-4 and IL-13 (M2). Expression levels were calculated as in A, data are  
10 mean±SEM for n=3. (C) qPCR analysis of *emr1* (F4/80) expression by RAW and MSRC2 cells  
11 cultured for 2h in either plain media (M0), LPS (M1), or IL-4 and IL-13 (M2). Expression levels  
12 were calculated as in A, data are mean±SEM for n=3; \*P<0.05, \*\*\*P<0.0005.

13

14 **Supporting Figure 2. RAW cells, but not MSRC2 cells, exhibit a phagocytosis profile**

15 **consistent with M2 polarization.** (A) Flow staining of MSRC2 and WT RAW cells following  
16 exposure to AdOVA and incubation with PE-stained carboxy-modified beads. Macrophages  
17 were gated as live singlets with positive CFSE uptake, images are representative of 3  
18 independent experiments. (B) Quantification of A, showing the percent of cells containing  
19 fluorescence corresponding to the presence of 2+ beads as mean±SEM for n=3 replicates,  
20 \*\*P<0.005.

21

22 **Supporting Figure 3. Quantification of Western blot results.** Densitometry analysis of  
23 phosphorylated mTOR (**A**) and Mertk (**B**) protein in RAW and MSRC2 cells cultured for 2h in  
24 either plain media (M0), LPS (M1), or IL-4 and IL-13 (M2). Data are presented as the ratio of  
25 intensity of the phospho-mTOR or phospho-Mertk bands divided by the total mTOR or total  
26 Mertk bands respectively, normalized to the expression of actin.

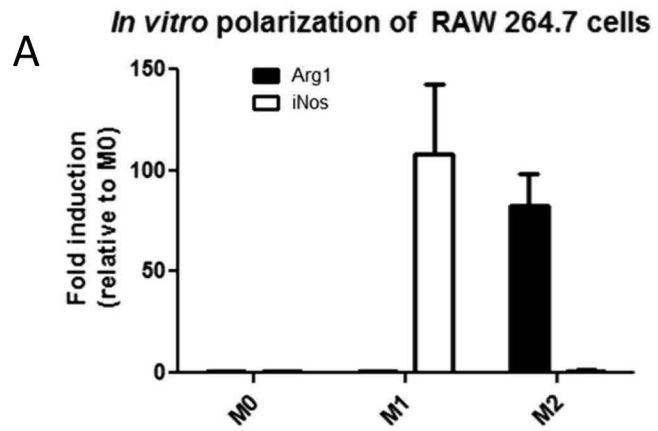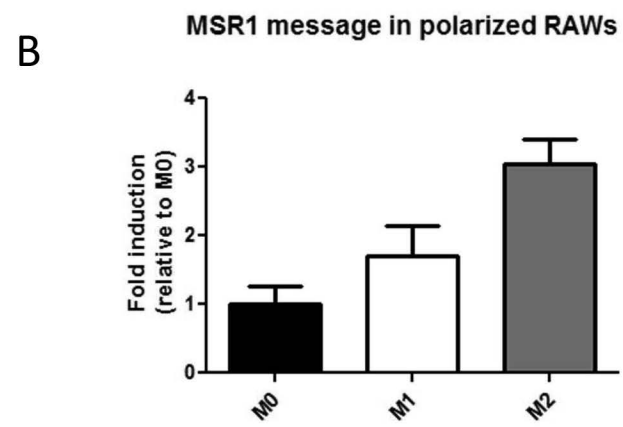

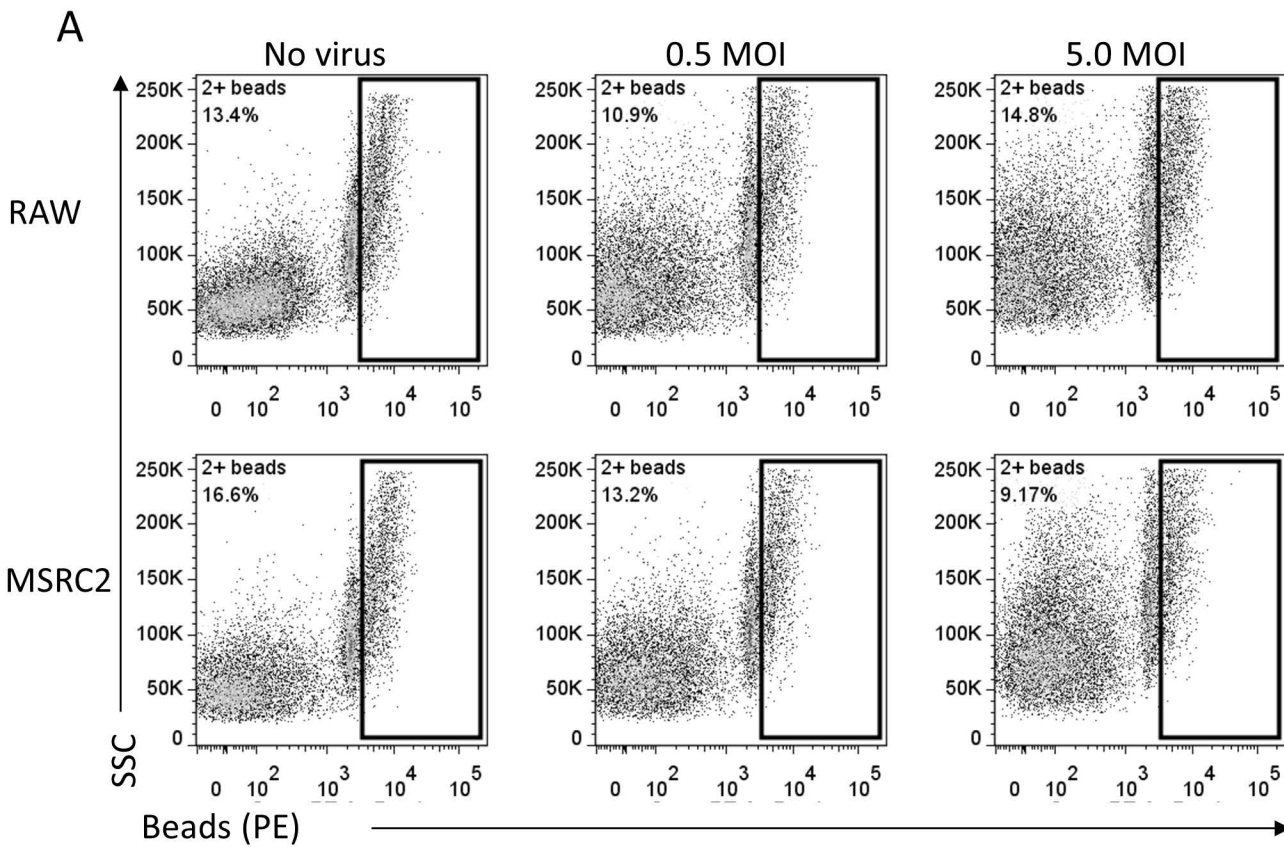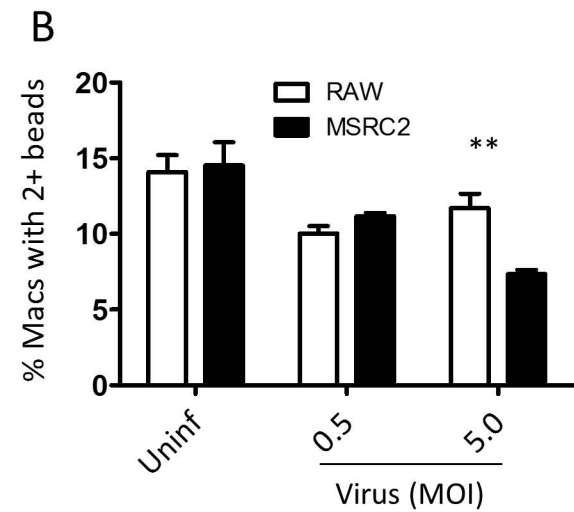

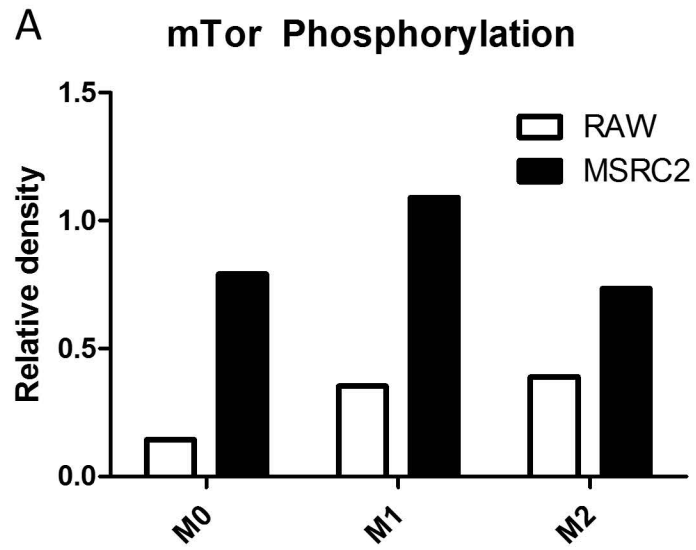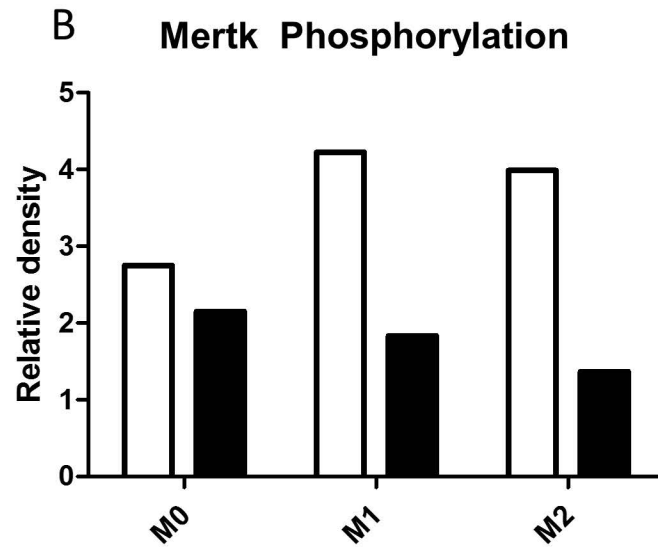

Supplement: HEP-65-32-s001.pdf [file HEP-65-32-s001.pdf]
